# Supplementary material for: Microwave solution route to ceramic ZnAl2O4 nanoparticles in 10 minutes: inversion and photophysical changes with thermal history
Source: Royal Society of Chemistry journal article supplement (doi:10.1039/c7nj01006k), 2017-01-01
Supplement: c7nj01006k1.pdf [file c7nj01006k1.pdf]

NJC

ARTICLE

Electronic Supplementary Information

**Microwave solution route to ceramic  $\text{ZnAl}_2\text{O}_4$  nanoparticles in 10-minutes: Inversion and photophysical changes with thermal history**

Samvit G. Menon <sup>a</sup>, Khoobaram S. Choudhari <sup>a</sup>, Srinivasrao A. Shivashankar <sup>b</sup>, Santhosh Chidangil <sup>a</sup>  
and Suresh D. Kulkarni <sup>a\*</sup>

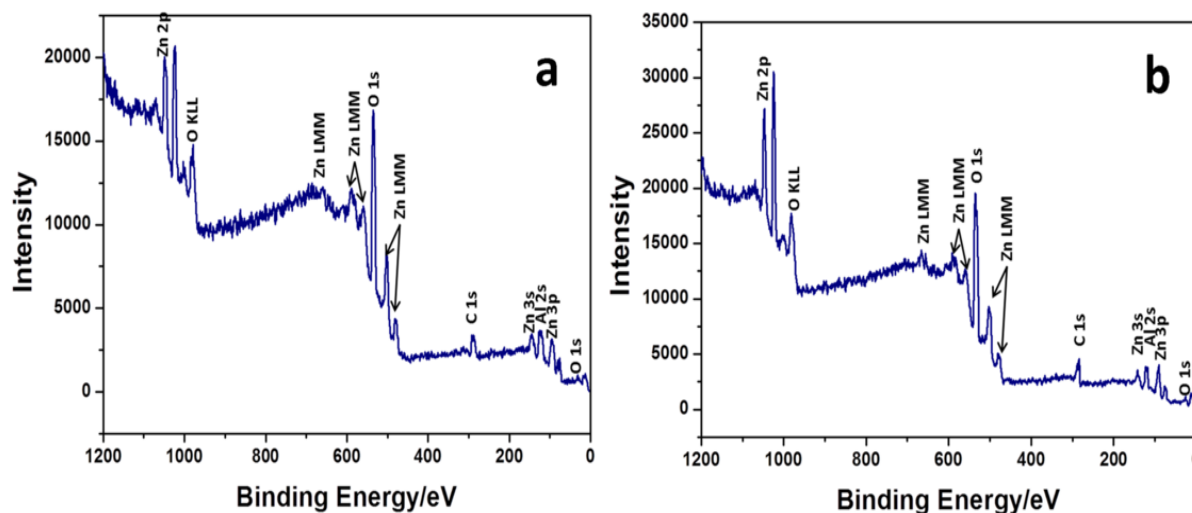

Figure S1. XPS survey spectra of (a) sample A and (b) sample E
